# Supplementary material
Source: PubMed Central journal article supplement (PMC2814331)
Supplement: NIHMS162700-supplement-1.pdf [file NIHMS162700-supplement-1.pdf]

**Supplementary Figure 1.** *Tg(SMN2)2Hung* junction specific PCR on Li-SMA model mice from France. Tail biopsies from Li-SMA model mice that are used in France were analyzed with junction specific primers and found to be positive (noted as France 5058). TjL-005058 mice were used as a positive control and TjL-005024, which contain a different *SMN2* BAC transgene, *(SMN2)Ahmb89*, was used as a negative control along with wild type FVB/N DNA. A primer set that amplifies all *SMN2* BAC transgenes was used as a control to demonstrate the presence of *SMN2* in all DNA samples except wild type FVB/N mice.
